# Supplementary material for: The Application of the Extended Poincaré Plot in the Analysis of Physiological Variabilities
Source: PubMed Central journal article supplement (PMC6390508; doi:10.3389/fphys.2019.00116), 2019-02-19

## Supplementary materials

**Supplementary material 1.** MATLAB code for calculating the extended Poincaré plot indices i.e. Pearson's correlation coefficient ( $r$ ), SD1 and SD2. Let  $A$  be a matrix which corresponds to a physiological time-series such as inter-beat interval, inter-breath interval or body temperature. This script can be save as a MATLAB function (extpoinc.m). Inputs:  $A$  (time-series) and  $k$  (maximum lag). Outputs: Pearson's  $r$  ( $r$ ), P-value for the correlation coefficient ( $P$ ), SD1 and SD2.

```
function [r,P, SD1, SD2] = extpoinc(A,k) % MATLAB function
for calculating the extended Poincaré plot indices.
Inputs: A (a time-series) and k (maximum steps/lags in the
extended Poincare' plot). Outputs: Pearson's r (r), P-
value for the correlation coefficient (P), SD1 and SD2.

n = size (A);
r = NaN(k,1);
P = NaN(k,1);
SD1 = NaN(k,1);
SD2 = NaN(k,1);

for i=1:k

    X = A(1:n-i);
    Y = A(i+1:n);
    [cc,p] = corrcoef(X,Y);
    r (i,1) = cc(1,2);
    P (i,1) = p(1,2);
    SD1 (i,1)= std((X - Y)./sqrt(2));
    SD2 (i,1)= std((X + Y)./sqrt(2));
end
```

**Supplementary material 2.** Receiver operating characteristic (ROC) curves used to evaluate the diagnostic capability of the extended Poincaré plot indices to differentiate between atopic and non-atopic asthma as well as controlled and uncontrolled asthma. (a) Pearson's correlation coefficient, r. (b) SD1 (c) SD2. (\*optimal steps for disease classification)

| (a)<br>Steps (k) | Atopic vs non-atopic asthma |                |                           | Controlled vs uncontrolled asthma |                |                           |
|------------------|-----------------------------|----------------|---------------------------|-----------------------------------|----------------|---------------------------|
|                  | Area under the curve        | Standard error | Asymptomatic Significance | Area under the curve              | Standard error | Asymptomatic Significance |
| 1                | 0.920                       | 0.050          | 0.000                     | 0.795                             | 0.084          | 0.009                     |
| 2                | 0.965                       | 0.029          | 0.000                     | 0.860                             | 0.077          | 0.002*                    |
| 3                | 0.980                       | 0.023          | 0.000*                    | 0.835                             | 0.078          | 0.003                     |
| 4                | 0.835                       | 0.080          | 0.003                     | 0.790                             | 0.087          | 0.011                     |
| 5                | 0.865                       | 0.082          | 0.001                     | 0.855                             | 0.076          | 0.002                     |
| 6                | 0.805                       | 0.081          | 0.007                     | 0.705                             | 0.110          | 0.071                     |
| 7                | 0.780                       | 0.091          | 0.014                     | 0.715                             | 0.096          | 0.059                     |
| 8                | 0.875                       | 0.069          | 0.001                     | 0.795                             | 0.082          | 0.009                     |
| 9                | 0.715                       | 0.100          | 0.059                     | 0.735                             | 0.095          | 0.039                     |
| 10               | 0.720                       | 0.093          | 0.053                     | 0.815                             | 0.082          | 0.006                     |
| 11               | 0.830                       | 0.081          | 0.004                     | 0.815                             | 0.077          | 0.006                     |
| 12               | 0.815                       | 0.079          | 0.006                     | 0.860                             | 0.070          | 0.002*                    |
| 13               | 0.825                       | 0.075          | 0.004                     | 0.720                             | 0.105          | 0.053                     |
| 14               | 0.660                       | 0.106          | 0.159                     | 0.630                             | 0.111          | 0.253                     |
| 15               | 0.665                       | 0.105          | 0.147                     | 0.745                             | 0.097          | 0.031                     |
| 16               | 0.810                       | 0.079          | 0.006                     | 0.800                             | 0.082          | 0.008                     |
| 17               | 0.745                       | 0.090          | 0.031                     | 0.790                             | 0.083          | 0.011                     |
| 18               | 0.795                       | 0.092          | 0.009                     | 0.755                             | 0.089          | 0.025                     |
| 19               | 0.810                       | 0.080          | 0.006                     | 0.785                             | 0.085          | 0.012                     |
| 20               | 0.725                       | 0.093          | 0.048                     | 0.825                             | 0.082          | 0.004                     |

| (b)<br>Steps (k) | Atopic vs non-atopic asthma |                |                           | Controlled vs uncontrolled asthma |                |                           |
|------------------|-----------------------------|----------------|---------------------------|-----------------------------------|----------------|---------------------------|
|                  | Area under the curve        | Standard error | Asymptomatic Significance | Area under the curve              | Standard error | Asymptomatic Significance |
| 1                | 0.920                       | 0.048          | 0.000                     | 0.880                             | 0.062          | 0.001                     |
| 2                | 0.920                       | 0.049          | 0.000                     | 0.880                             | 0.063          | 0.001                     |
| 3                | 0.920                       | 0.051          | 0.000                     | 0.875                             | 0.064          | 0.001                     |
| 4                | 0.905                       | 0.055          | 0.000                     | 0.875                             | 0.064          | 0.001                     |
| 5                | 0.910                       | 0.054          | 0.000                     | 0.880                             | 0.064          | 0.001                     |
| 6                | 0.915                       | 0.052          | 0.000                     | 0.885                             | 0.063          | 0.001                     |
| 7                | 0.910                       | 0.054          | 0.000                     | 0.880                             | 0.064          | 0.001                     |
| 8                | 0.910                       | 0.054          | 0.000                     | 0.880                             | 0.064          | 0.001                     |
| 9                | 0.910                       | 0.053          | 0.000                     | 0.880                             | 0.064          | 0.001                     |
| 10               | 0.910                       | 0.054          | 0.000                     | 0.885                             | 0.063          | 0.001                     |
| 11               | 0.910                       | 0.054          | 0.000                     | 0.885                             | 0.063          | 0.001                     |
| 12               | 0.910                       | 0.053          | 0.000                     | 0.880                             | 0.063          | 0.001                     |
| 13               | 0.910                       | 0.054          | 0.000                     | 0.880                             | 0.064          | 0.001                     |
| 14               | 0.910                       | 0.054          | 0.000                     | 0.885                             | 0.063          | 0.001                     |
| 15               | 0.905                       | 0.055          | 0.000                     | 0.885                             | 0.063          | 0.001                     |
| 16               | 0.910                       | 0.054          | 0.000                     | 0.880                             | 0.064          | 0.001                     |
| 17               | 0.910                       | 0.054          | 0.000                     | 0.880                             | 0.064          | 0.001                     |
| 18               | 0.905                       | 0.055          | 0.000                     | 0.880                             | 0.063          | 0.001                     |
| 19               | 0.910                       | 0.053          | 0.000                     | 0.885                             | 0.063          | 0.001                     |
| 20               | 0.915                       | 0.052          | 0.000                     | 0.895                             | 0.059          | 0.001                     |

| (c)<br>Steps (k) | Atopic vs non-atopic asthma |                |                           | Controlled vs uncontrolled asthma |                |                           |
|------------------|-----------------------------|----------------|---------------------------|-----------------------------------|----------------|---------------------------|
|                  | Area under the curve        | Standard error | Asymptomatic Significance | Area under the curve              | Standard error | Asymptomatic Significance |
| 1                | 0.865                       | 0.066          | 0.001                     | 0.850                             | 0.069          | 0.002                     |
| 2                | 0.865                       | 0.067          | 0.001                     | 0.850                             | 0.069          | 0.002                     |
| 3                | 0.860                       | 0.069          | 0.002                     | 0.840                             | 0.072          | 0.003                     |
| 4                | 0.880                       | 0.063          | 0.001                     | 0.850                             | 0.069          | 0.002                     |
| 5                | 0.875                       | 0.064          | 0.001                     | 0.855                             | 0.068          | 0.002                     |
| 6                | 0.880                       | 0.063          | 0.001                     | 0.855                             | 0.068          | 0.002                     |
| 7                | 0.880                       | 0.063          | 0.001                     | 0.850                             | 0.069          | 0.002                     |
| 8                | 0.875                       | 0.064          | 0.001                     | 0.855                             | 0.068          | 0.002                     |
| 9                | 0.875                       | 0.064          | 0.001                     | 0.850                             | 0.069          | 0.002                     |
| 10               | 0.880                       | 0.063          | 0.001                     | 0.855                             | 0.068          | 0.002                     |
| 11               | 0.875                       | 0.064          | 0.001                     | 0.850                             | 0.069          | 0.002                     |
| 12               | 0.880                       | 0.063          | 0.001                     | 0.855                             | 0.068          | 0.002                     |
| 13               | 0.870                       | 0.065          | 0.001                     | 0.850                             | 0.069          | 0.002                     |
| 14               | 0.885                       | 0.061          | 0.001                     | 0.855                             | 0.068          | 0.002                     |
| 15               | 0.890                       | 0.060          | 0.001                     | 0.855                             | 0.068          | 0.002                     |
| 16               | 0.885                       | 0.062          | 0.001                     | 0.855                             | 0.068          | 0.002                     |
| 17               | 0.880                       | 0.063          | 0.001                     | 0.850                             | 0.069          | 0.002                     |
| 18               | 0.875                       | 0.064          | 0.001                     | 0.850                             | 0.069          | 0.002                     |
| 19               | 0.880                       | 0.063          | 0.001                     | 0.850                             | 0.069          | 0.002                     |
| 20               | 0.880                       | 0.063          | 0.001                     | 0.845                             | 0.070          | 0.002                     |

**Supplementary material 3.** Partial autocorrelation graphs for (a) Heart rate variability in cirrhotic patients (b) Inter-breath-interval variability in patients with asthma (c) Body temperature fluctuations in cirrhotic patients.

(a)

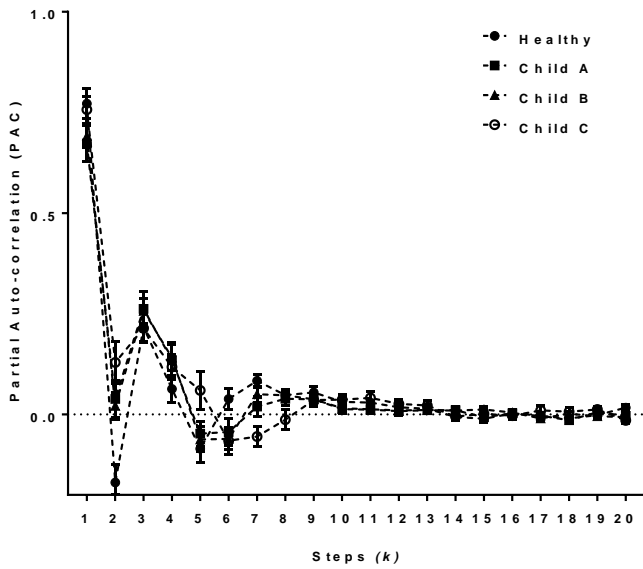

(b)

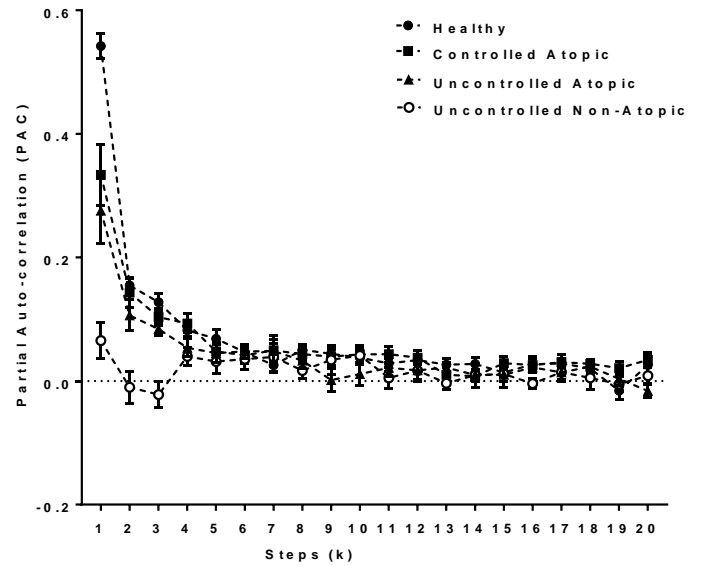

(c)

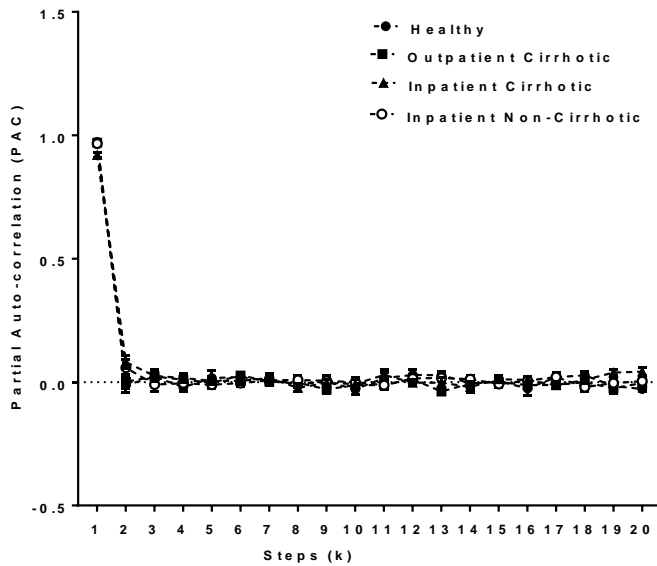

Supplement: Data_Sheet_1.pdf [file Data_Sheet_1.pdf]
